# Supplementary material for: Threshold-dependent repression of SPL gene expression by miR156/miR157 controls vegetative phase change in Arabidopsis thaliana
Source: PLoS Genet. 2018 Apr 19;14(4):e1007337. doi: 10.1371/journal.pgen.1007337 (PMC5929574; doi:10.1371/journal.pgen.1007337)
Supplement: S1 Table — (XLSX) [file pgen.1007337.s003.xlsx]

## Sheet: Sheet1
	S3 Table. Primers used in this study (5' to 3')
	Cloning
	MIM156-F	CACCAAGAAAAATGGCCATCCCCTAGC
	MIM156-R	GAGGAATTCACTATAAAGAGAATCG
	SPL9 XmaI-F	ATCCCGGGCGTCGTTACTCTTTAACTAACTACAGT
	SPL9-GUS SbfI R	GCCCTGCAGGTTCTTCAGGAGACGAGTCA
	qPCR
		Forward	Reverse
	At snoR101	CTTCACAGGTAAGTTCGCTTG	AGCATCAGCAGACCAGTAGTT
	miR157	GCGGCGGTTGACAGAAGATAG	GTGCAGGGTCCGAGGT
	miR156	GCGGCGGTGACAGAAGAGAGT	GTGCAGGGTCCGAGGT
	SPL2	TTTCCGATACCGAGCACAATAG	TACGGGTTGGAGGTTGCTTGAGG
	SPL3	ATGAGTATGAGAAGAAGCAAAGCG	TCCACTACTACTTGTAGCTTTACCT
	SPL4	TCAAGGGTAGAGATGACACTTCCTAT	TCTCCTTCGTGGCTCTGAAACTTC
	SPL5	CGATAGGTGCACTGTTAATTTGACT	TCTGGTAGCTCATGAAACCTGCTGCA
	SPL6	ACAGTGCAGCAGGTTTCATTTCCTC	CTCCAGAAACTTGTTGCCTACTAC
	SPL9	AATTGGCGACTCAAACTGTG	CTGAAGAAGCTCGCCATGTA
	SPL10	CAGACAAAGGTGTGGGAGAATGCTC	TAGGGAAAGTGCCAAATATTGGCG
	SPL11	AGTCCAAGTTTCAACTTCATGGCG	GAACAGAGTAGAGAAAATGGCTGC
	SPL13	GCTCGAGAACCGCATCGTT	CCCGTAAAAAACTGTCTCAACTGCT
	SPL15	TGAATGTTTTATCACATGGAAGCTC	TCATCGAGTCGAAACCAGAAGATG
	qSPL-Cleaved-F1	GGACTGAAGGAGTAGAAATCTTCTG
	GUS	CGTCCAAGGAAACAAGAAGGG	AGCGTTCTTGTAGCCGAAATC
	Genotyping
		LP	RP	T-DNA border primer
	miR156a-2	AAAGAGATCAGCACCGGAATC	CGCGCTTCACTTAAAATTACG	ATTTTGCCGATTTCGGAAC
	miR156c-1	AACAGATTCTTCCTCTCTTCTCC	AAAGAGATCACGACTAGAAATCACG	GAAACGGTCGGGAAACTAGCTCTAC
	miR157a-1	TTTATCATCCACATGCGGTG	TTTTGGTCATCATATAAACGAATTG	CGTGTGCCAGGTGCCCACGGAATAGT
	miR157c-1	TGCAAAATAGGTAGATAGGGCC	TCTCTCCAGTTACAAAACATGACC	ATTTTGCCGATTTCGGAAC
	miR156d-1	CGGTTTCTGGACTAATTGGAATTTCC	GACTCATCTTTTGAAGCTAGGAGTTGG	ATACGACGGATCGTAATTTGTCG
	mir156b-1	AGAGGGAGAGATGGTGATTGA	TGTCTAAGCCAAATTTGAGAGAG
	RT-PCR
	miR156	GTCGTATCCAGTGCAGGGTCCGAGGTATTCGCACTGGATACGACGTGCTCA
	miR157	GTCGTATCCAGTGCAGGGTCCGAGGTATTCGCACTGGATACGACGTGCTCT
	SPL transcript template amplification
		Forward	Reverse
	T7-SPL3	TAATACGACTCACTATAGGGcaaCCACAAAATAAACCGG	ttttttttttttttttttttttGGCTTGAAATAAC
	T7-SPL5	TAATACGACTCACTATAGGGatgGAGGGTCAGAGAACACA	tttttttttttttttttttttGTAAAAAACACATTAC
	T7-SPL6	TAATACGACTCACTATAGGGatgGATTCTTGGAGCTACG	tttttttttttttttttttttAGGCATAGATATC
	T7-SPL9	TAATACGACTCACTATAGGGatgGAGATGGGTTCCAACT	ttttttttttttttttttttttAATCTGATCTCA
	T7-SPL15	TAATACGACTCACTATAGGGatgGAGTTGTTAATGTGTTCGG	tttttttttttttttttttttGAAAAAAACATCC
	T7-SPL13	TAATACGACTCACTATAGGGATGGACTGGAATTTCAAACTTAGC	ttttttttttttttttttttttCAAAAAGAGGTTTC
